# Supplementary material for: Positional RNA-Seq identifies candidate genes for phenotypic engineering of sexual traits
Source: PubMed Central journal article supplement (PMC4490696; doi:10.1186/s12983-015-0106-0), 2015-07-03

Control

Knock-down

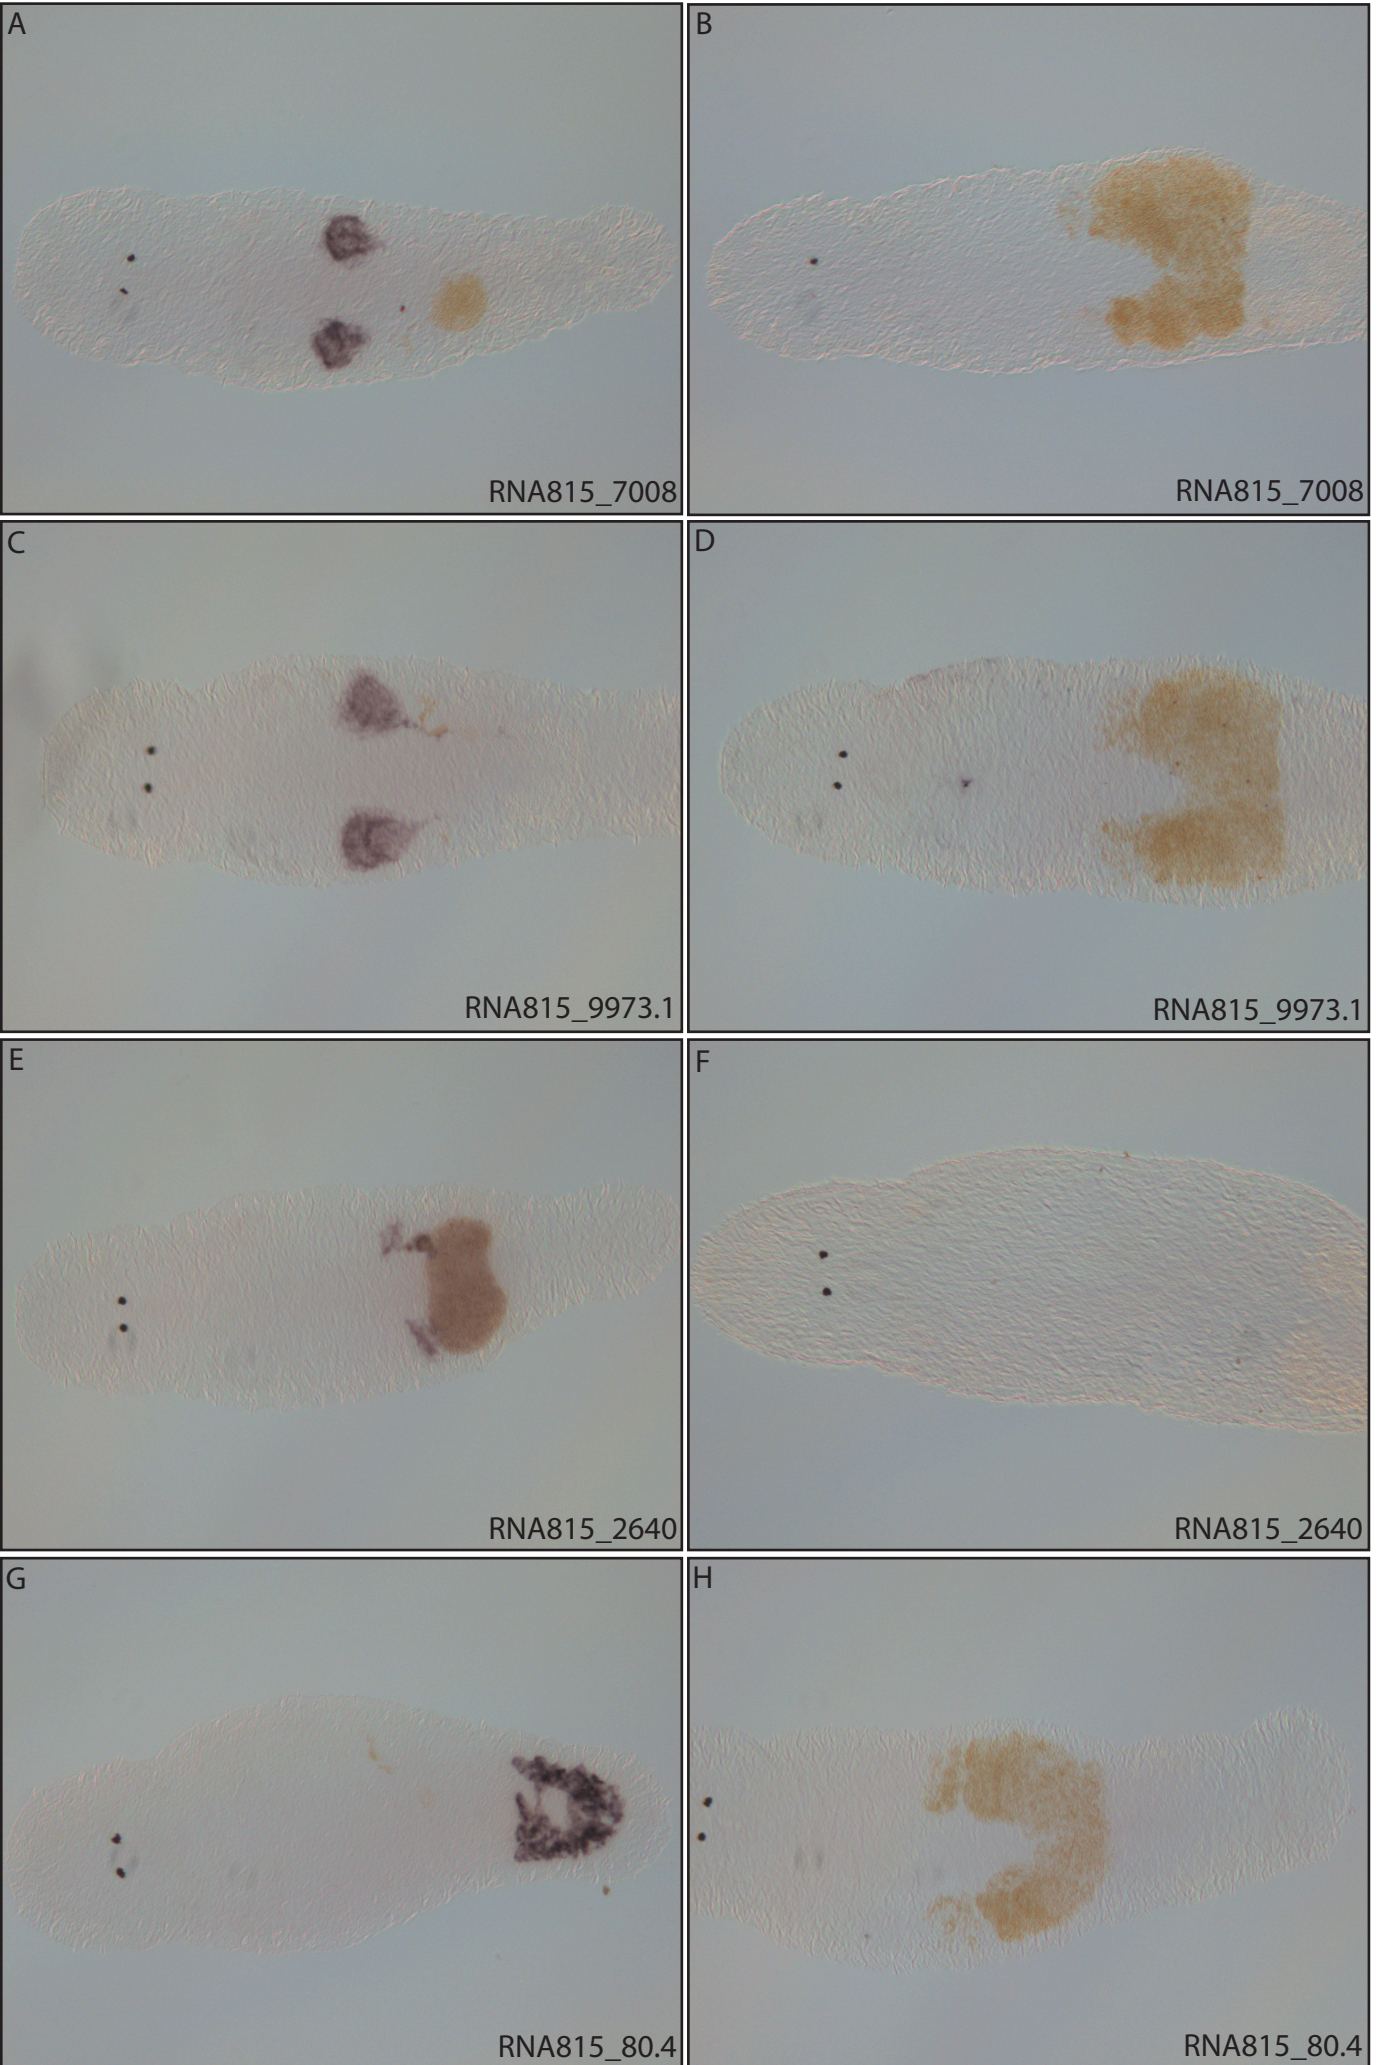

Supplement: 12983_2015_106_MOESM6_ESM.pdf [file 12983_2015_106_MOESM6_ESM.pdf]
